# Supplementary material for: Molecular imaging HDACs class IIa expression-activity and pharmacologic inhibition in intracerebral glioma models in rats using PET/CT/(MRI) with [18F]TFAHA
Source: PubMed Central journal article supplement (PMC6401080; doi:10.1038/s41598-019-40054-2), 2019-03-05
Supplement: 41598_2019_40054_MOESM1_ESM.pdf [file 41598_2019_40054_MOESM1_ESM.pdf]

1           **Molecular imaging HDACs class IIa expression-activity and pharmacologic inhibition in**  
2           **intracerebral glioma models in rats using PET/CT/(MR) with [<sup>18</sup>F]TFAHA.**

3  
4 Maxwell T. Laws<sup>1</sup>, Robin E. Bonomi<sup>1</sup>, Swatabdi Kamal<sup>1</sup>, David J. Gelovani<sup>1</sup>, Jeremy Llaniguez<sup>1</sup>, Shreya  
5 Potukutchi<sup>1</sup>, Xin Lu<sup>2</sup>, Thomas Mangner<sup>2</sup>, and Juri G. Gelovani<sup>1,3,4,5\*</sup>

6  
7 1) Department of Biomedical Engineering, College of Engineering and School of Medicine, Wayne  
8 State University, Detroit, MI 48202, USA

9 2) Positron Emission Tomography Center, Wayne State University, Detroit, MI 48202, USA

10 3) Department of Oncology, Wayne State University, Detroit, MI 48202, USA

11 4) Department of Neurosurgery, Wayne State University, Detroit, MI 48202, USA

12 5) Molecular Imaging Program, Karmanos Cancer Institute, Wayne State University, Detroit, MI, 48201,  
13 USA

14  
15 \* Correspondence and requests for materials should be addressed to J.G.G. (email:  
16 [juri.gelovani@wayne.edu](mailto:juri.gelovani@wayne.edu))

Figure S1

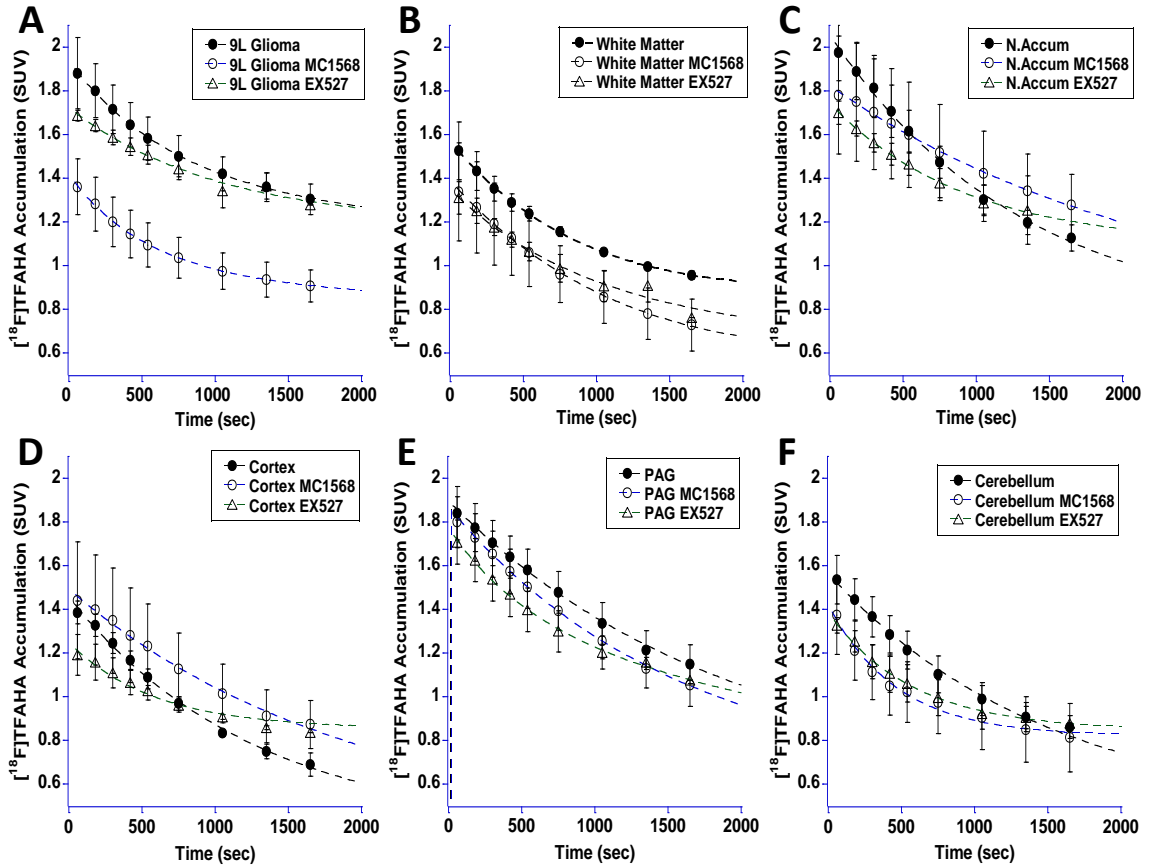

**Figure S1.** Time-activity curves of [<sup>18</sup>F]TFAHA after intravenous administration in the brain of rats bearing intracerebral 9L gliomas: **A)** 9L gliomas; **B)** white matter; **C)** *n.accumbens*; **D)** cortex; **E)** periaqueductal gray (PAG) matter; **F)** cerebellum. Data points in the time-activity curves determined under different conditions are: before treatment - closed circles; after treatment with MC1568 – open circles; after treatment with EX-527 – open triangles. Data points: mean±SEM. The magnitude of [<sup>18</sup>F]TFAHA-derived radioactivity in individual regions is presented as standard uptake value (SUV). Time scale is in seconds (sec).

The magnitude of [<sup>18</sup>F]TFAHA time-activity curves (TACs) was statistically significantly decreased ( $p < 0.005$ ) in 9L gliomas after pre-treatment of animals with MC1568, whereas no significant differences in the magnitude and profiles of [<sup>18</sup>F]TFAHA TACs were observed after pre-treatment with EX-527 (**Fig. S1**). Also, no statistically significant decreases in [<sup>18</sup>F]TFAHA TACs were observed in the contralateral normal brain structures known to overexpress HDACs class IIa (i.e., *n.accumbens*, PAG, cerebellum).

Figure S2

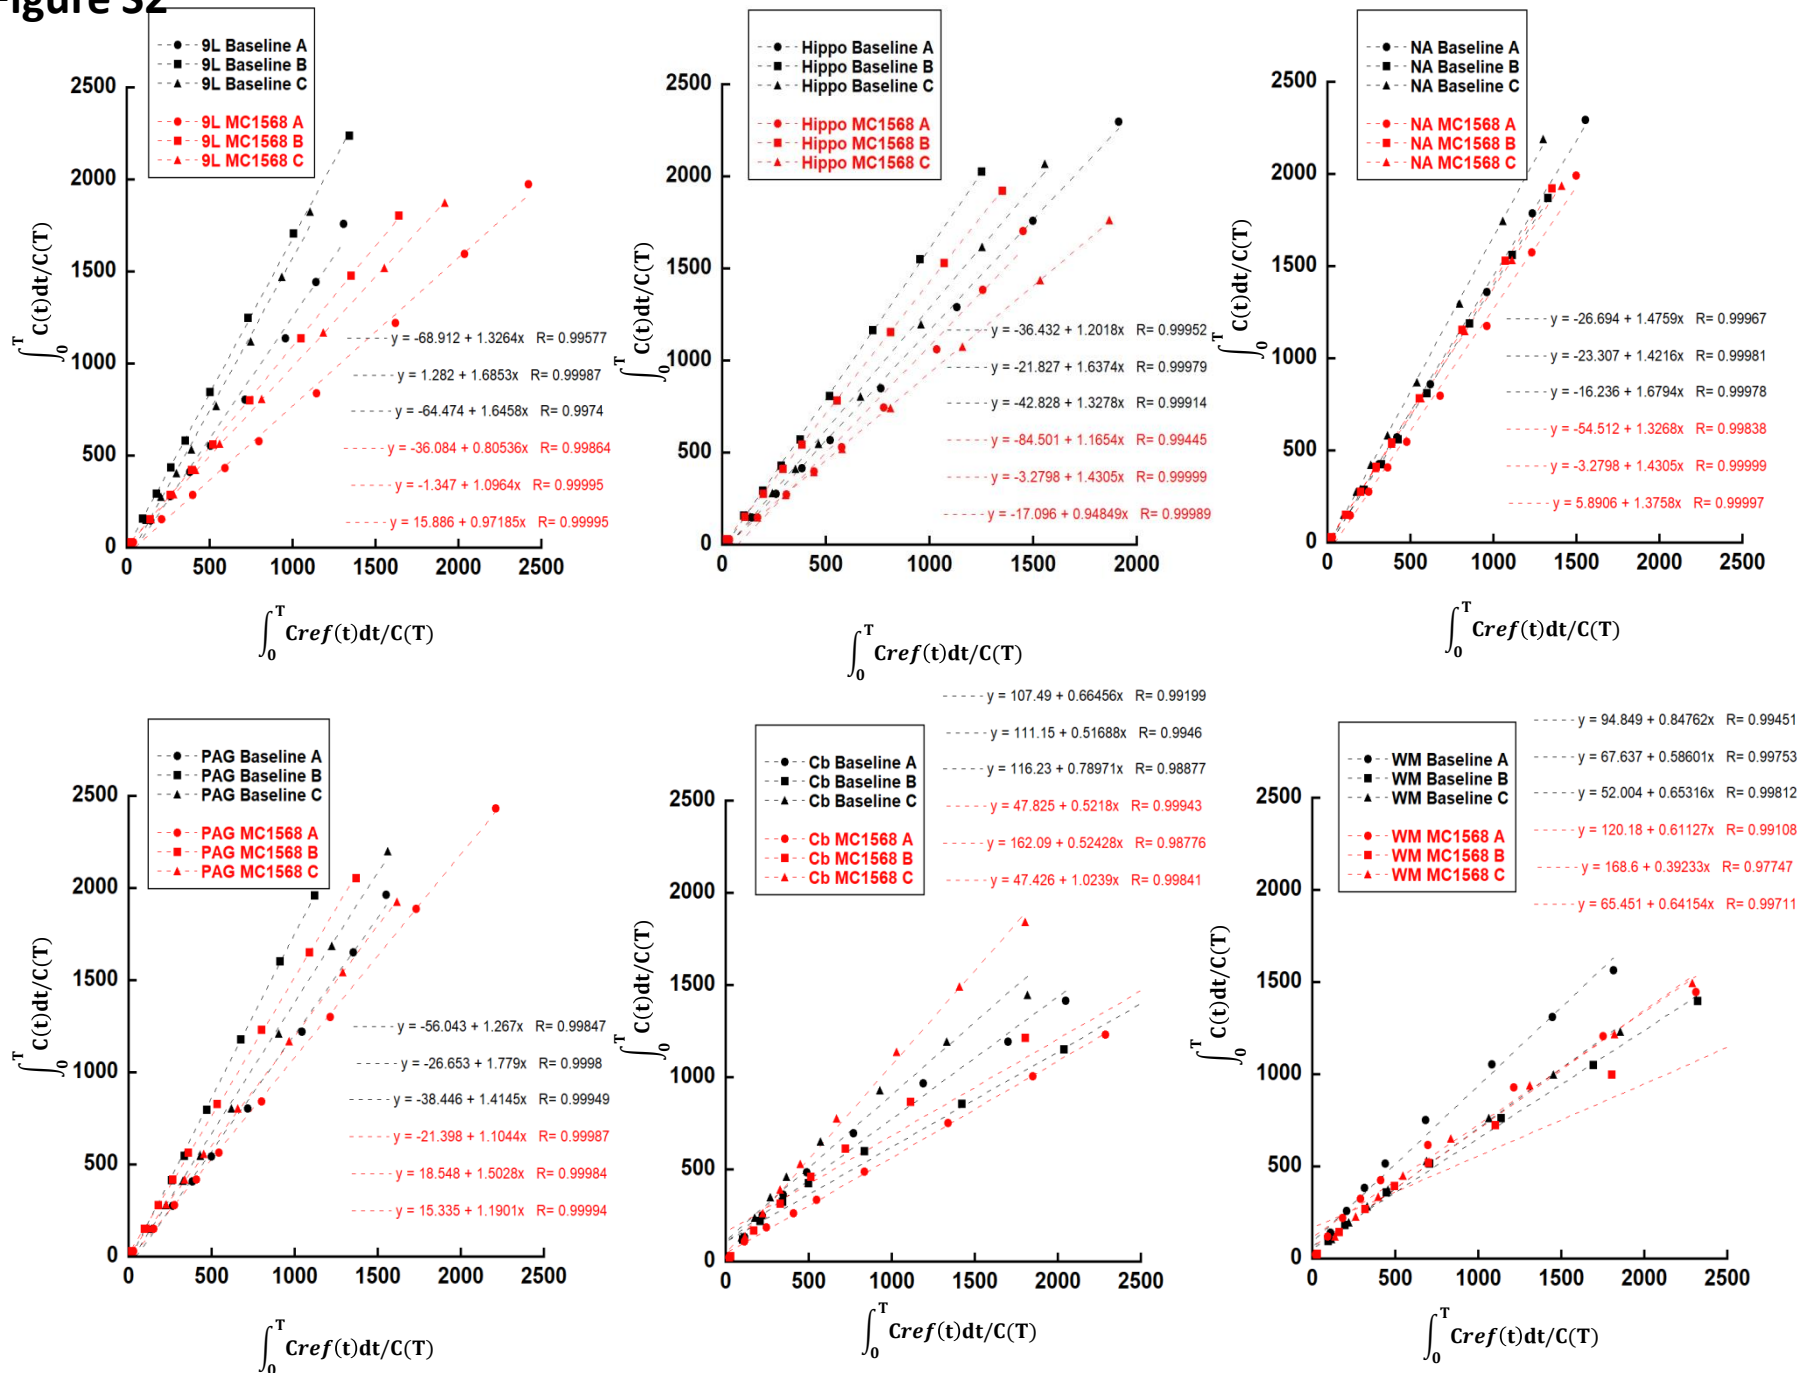

**Figure S2.** Logan graphical analyses of transient retention of [<sup>18</sup>F]TFAHA-derived radioactivity in 9L tumors and different brain structures in the same animals (N=3) at baseline (black) and after therapy with MC1568 (red); Data points for individual animals are shown in different shapes (circle, square, triangle). Panels: 9L (9L glioma), Hippo (contralateral *hippocampus*), NA (contralateral *n.accumbens*), PAG (periaqueductal grey), Cb (cerebellum), WM (contralateral white matter). Linear regression equations for individual animal data points are listed in the same sequence as the data legends. Linear regression coefficients represent DVs of [<sup>18</sup>F]TFAHA-derived radioactivity in 9L tumors and various structures of the brain.

Figure S3

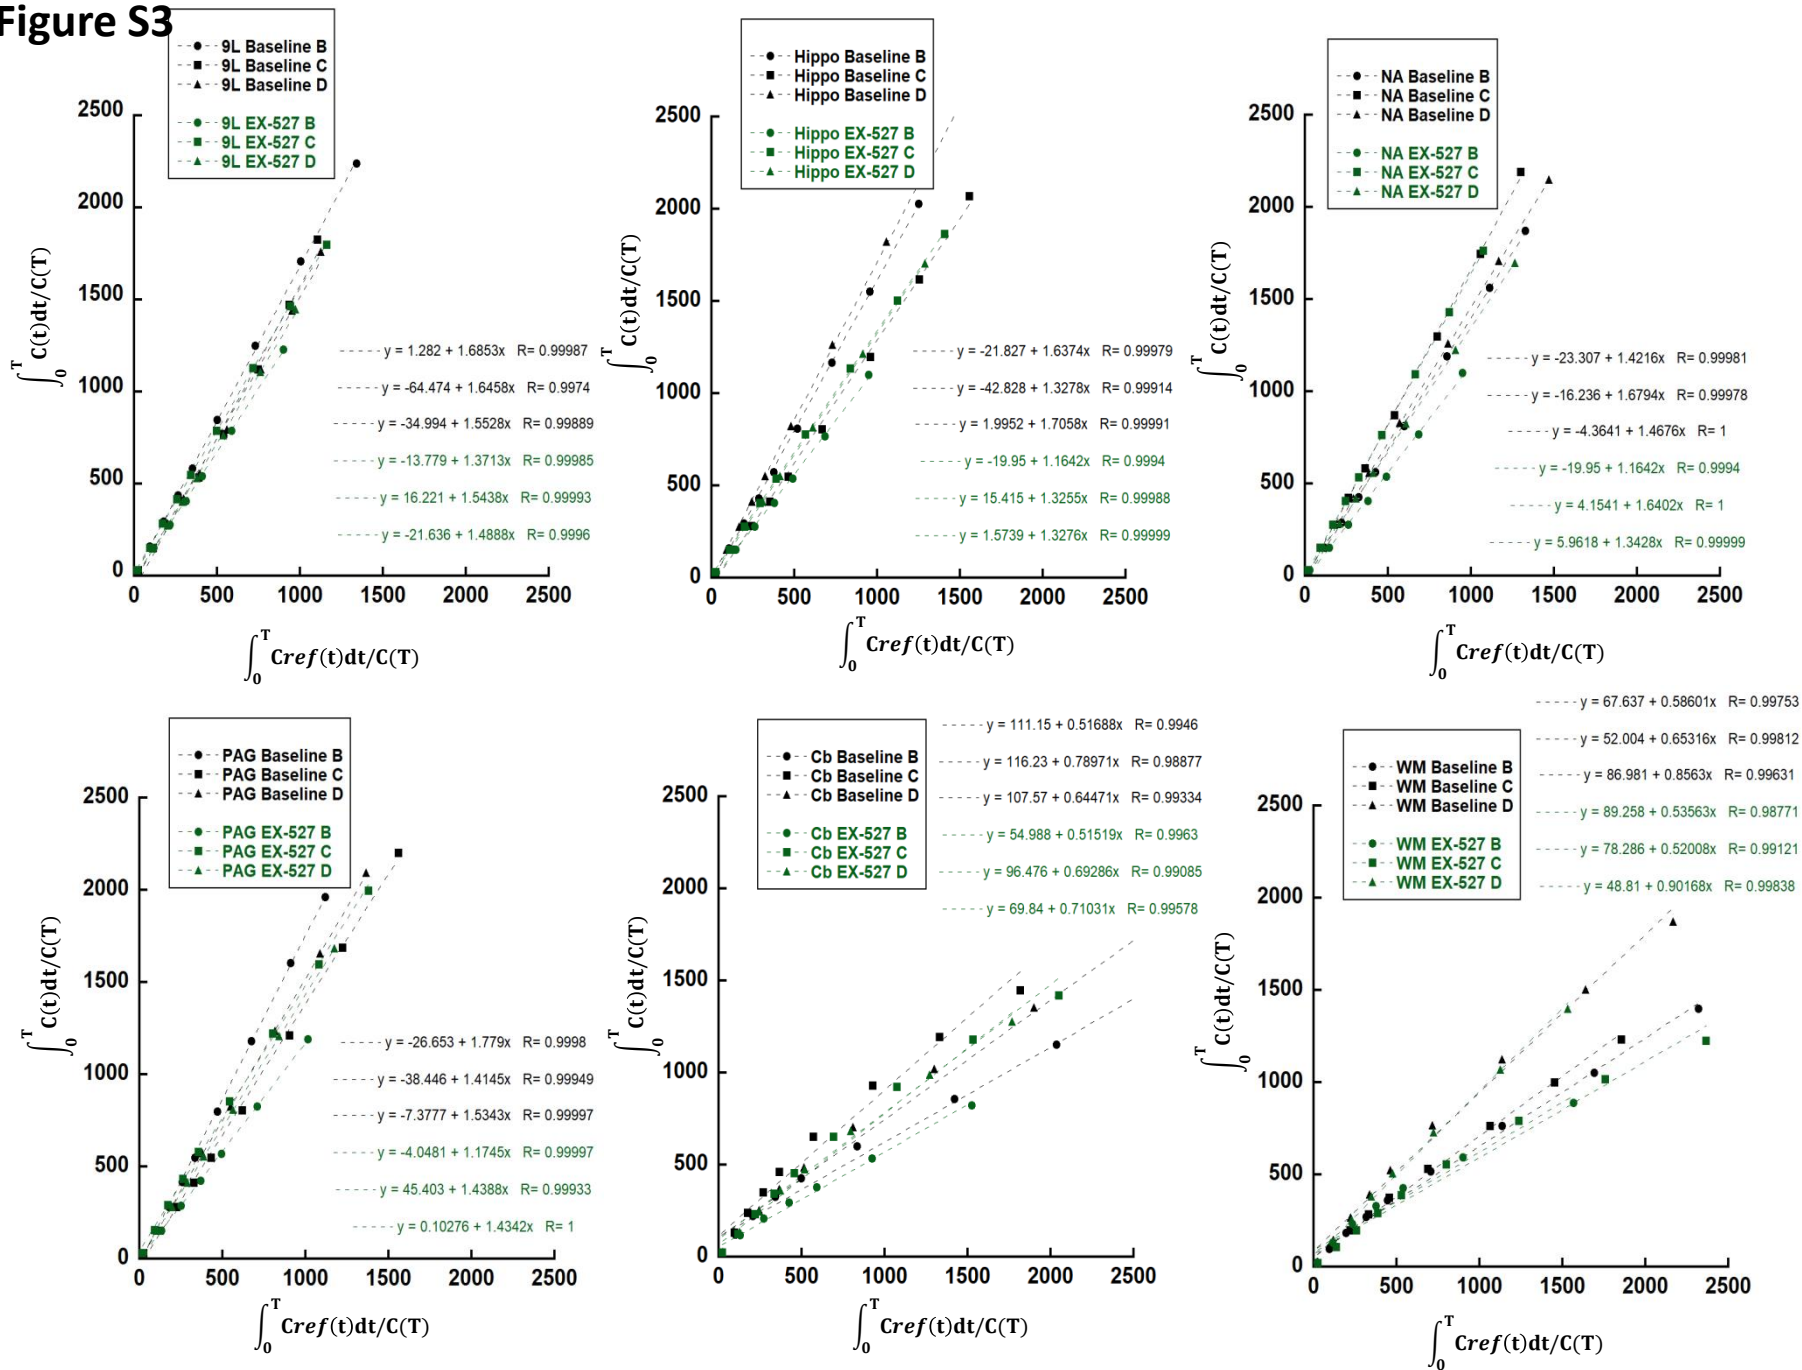

**Figure S3.** Logan graphical analyses of transient retention of [<sup>18</sup>F]TFAHA-derived radioactivity in 9L tumors and different brain structures in the same animals (N=3) at baseline (black) and after therapy with EX-527 (green); Data points for individual animals are shown in different shapes (circle, square, triangle). Panels: 9L (9L glioma), Hippo (contralateral *hippocampus*), NA (contralateral *n.accumbens*), PAG (periaqueductal grey), Cb (cerebellum), WM (contralateral white matter). Linear regression equations for individual animal data points are listed in the same sequence as the data legends. Linear regression coefficients represent DVs of [<sup>18</sup>F]TFAHA-derived radioactivity in 9L tumors and various structures of the brain.

Figure S4

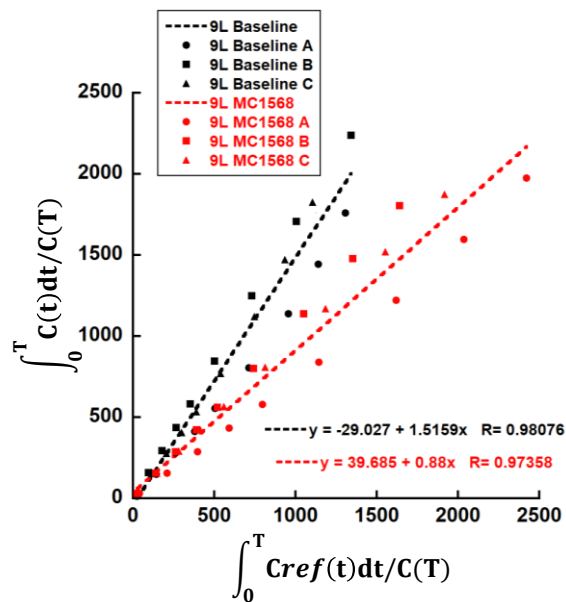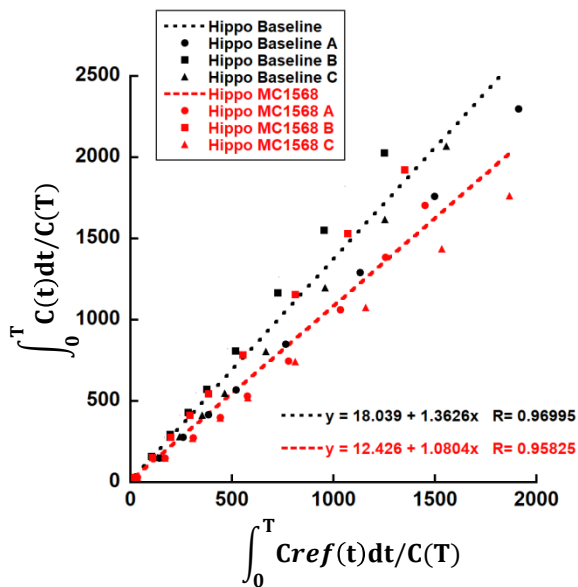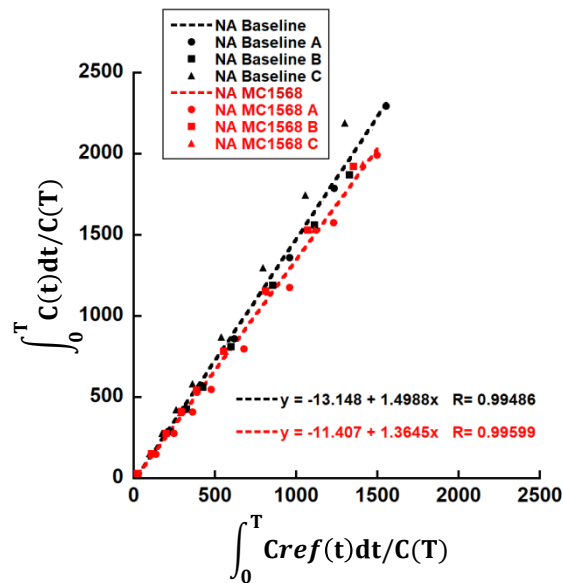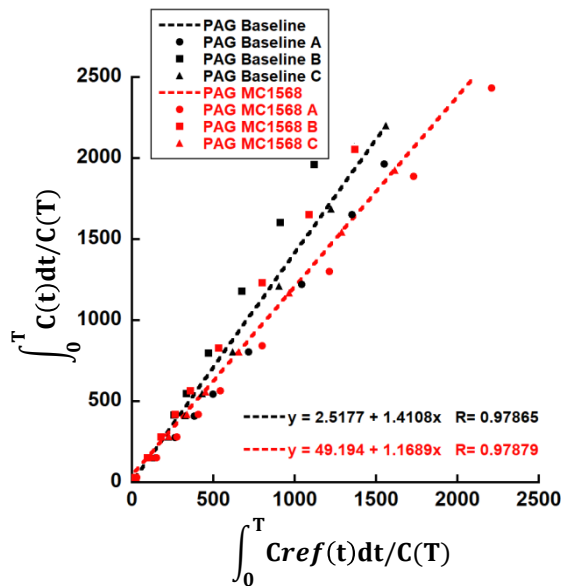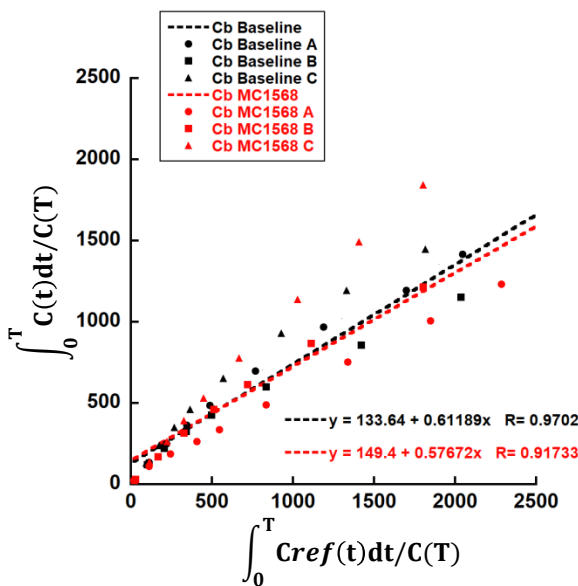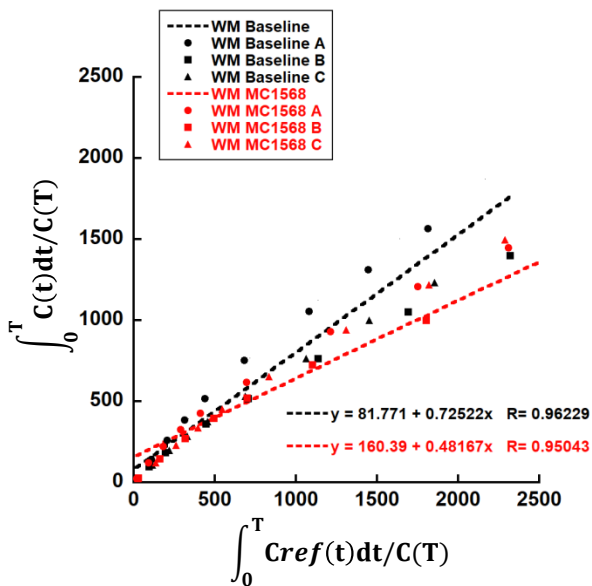



**Figure S4.** Logan graphical analyses of transient retention of [ $^{18}\text{F}$ ]TFAHA-derived radioactivity in 9L tumors and different brain structures of the same group animals (N=3) at baseline (black) and after therapy with MC1568 (red); Data points for individual animals are shown in different shapes (circle, square, triangle). Panels: 9L (9L glioma), Hippo (contralateral *hippocampus*), NA (contralateral *n.accumbens*), PAG (periaqueductal grey), Cb (cerebellum), WM (contralateral white matter). Linear regression lines and equations for the group data points are shown for baseline (black) and after treatment with MC1568 (red). Linear regression coefficients represent DVs of [ $^{18}\text{F}$ ]TFAHA-derived radioactivity in 9L tumors and various structures of the brain.

Figure S5

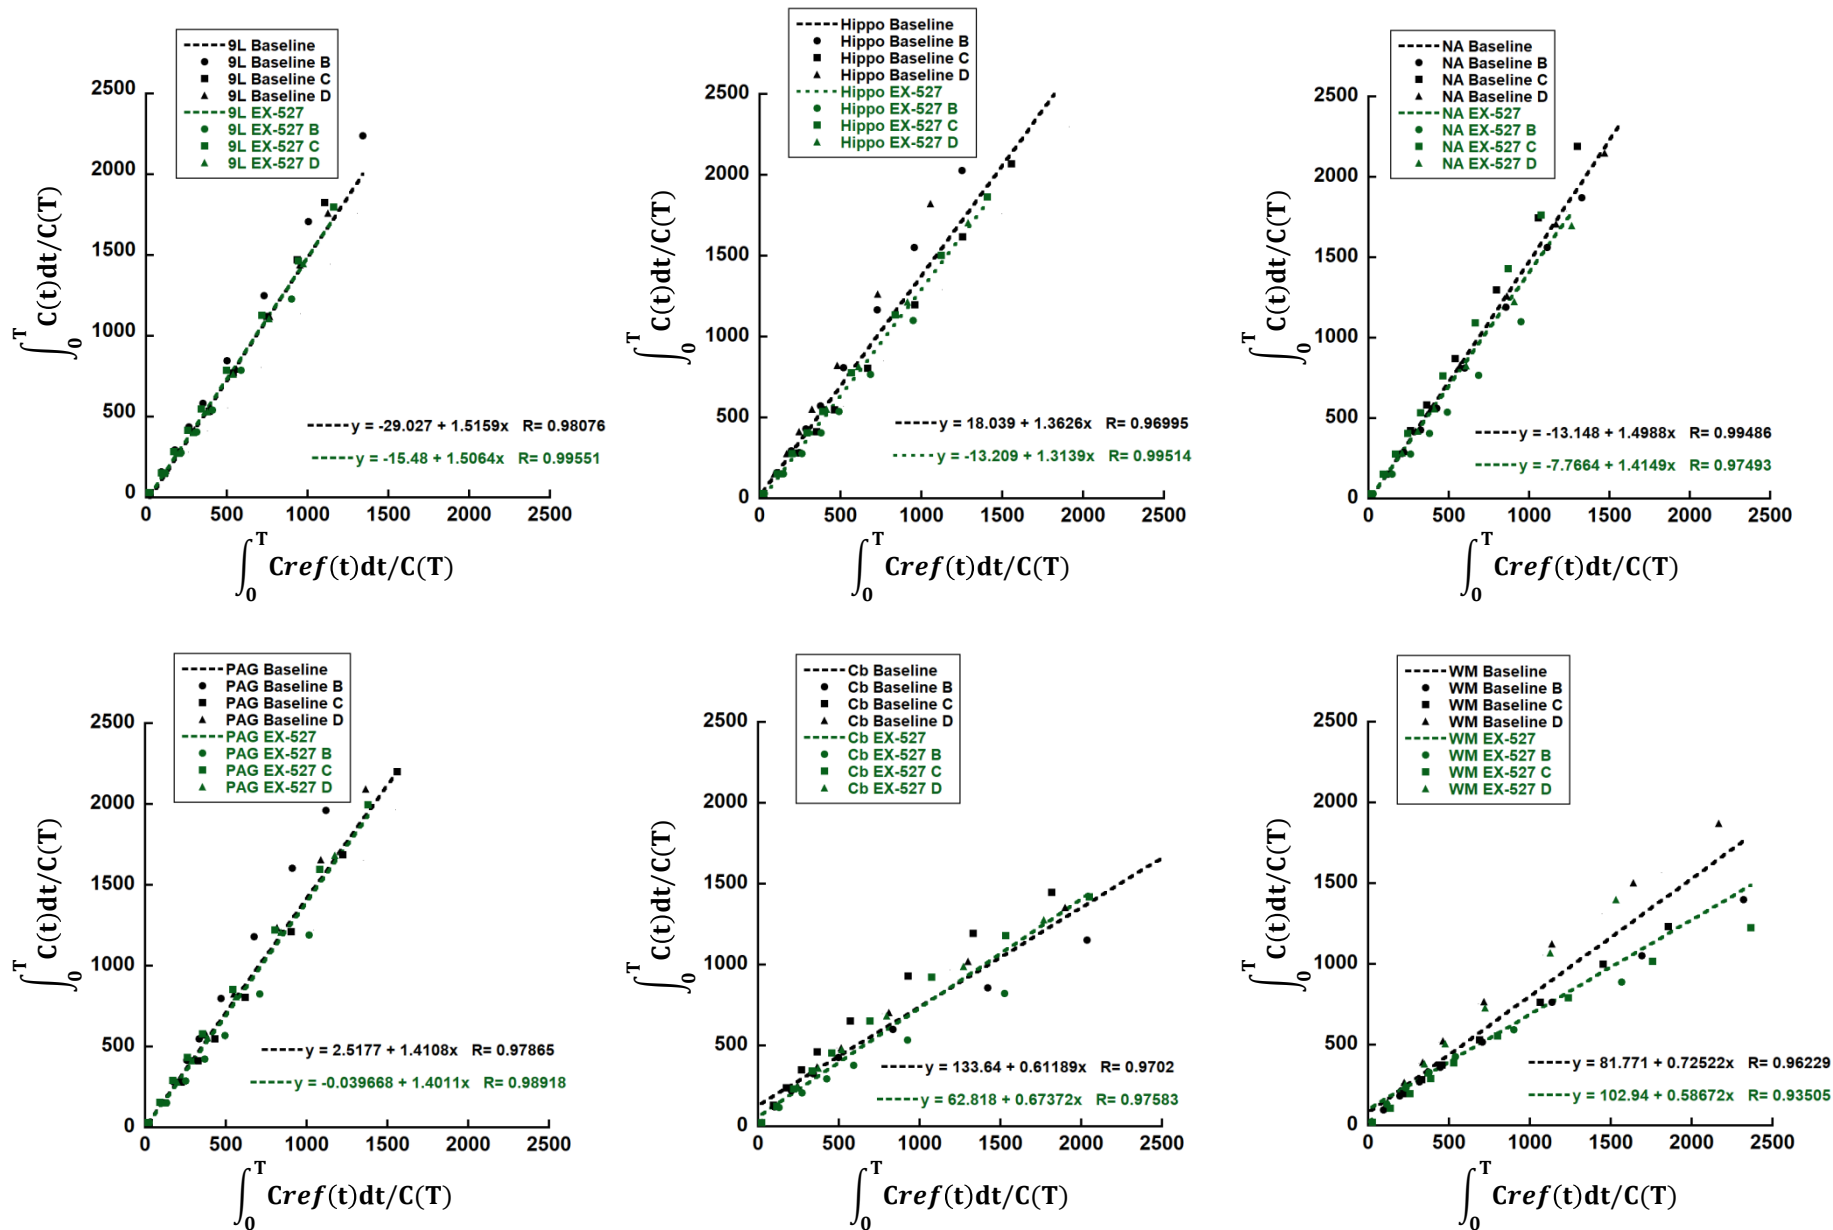

**Figure S5.** Logan graphical analyses of transient retention of [<sup>18</sup>F]TFAHA-derived radioactivity in 9L tumors and different brain structures of the same group animals (N=3) at baseline (black) and after therapy with EX-527 (green); Data points for individual animals are shown in different shapes (circle, square, triangle). Panels: 9L (9L glioma), Hippo (contralateral *hippocampus*), NA (contralateral *n.accumbens*), PAG (periaqueductal grey), Cb (cerebellum), WM (contralateral white matter). Linear regression lines and equations for the group data points are shown for baseline (black) and after treatment with EX-527 (green). Linear regression coefficients represent DVs of [<sup>18</sup>F]TFAHA-derived radioactivity in 9L tumors and various structures of the brain.
